# Supplementary material for: Permeability of the landscape matrix between amphibian breeding sites
Source: PubMed Central journal article supplement (PMC3539008; doi:10.1002/ece3.424), 2012-11-08

**Table S1.** Locations and elevations of the populations of *Rana temporaria* and *Triturus alpestris* included in this study. Genetic samples were available for populations indicated with an “x.”

| Population | Latitude (°N) | Longitude (°E) | Elevation (m) | <i>Rana temporaria</i> | <i>Triturus alpestris</i> |
|------------|---------------|----------------|---------------|------------------------|---------------------------|
| allm       | 47.4833       | 8.5424         | 420           | x                      | x                         |
| alls       | 47.4807       | 8.5451         | 422           | x                      | x                         |
| amb1       | 47.3024       | 8.7970         | 540           |                        | x                         |
| amb3       | 47.3012       | 8.7990         | 538           | x                      | x                         |
| amb4       | 47.3017       | 8.7974         | 539           |                        | x                         |
| anni       | 47.3882       | 8.4638         | 447           | x                      |                           |
| awma       | 47.4621       | 8.5412         | 424           | x                      |                           |
| birk       | 47.2964       | 8.8124         | 541           | x                      | x                         |
| bode       | 47.5648       | 8.7446         | 498           | x                      |                           |
| chaf       | 47.4034       | 8.5219         | 551           | x                      |                           |
| chap       | 47.4118       | 8.4994         | 520           | x                      | x                         |
| eige       | 47.4626       | 8.6238         | 507           | x                      |                           |
| ente       | 47.6163       | 8.6675         | 400           | x                      | x                         |
| eroa       | 47.6937       | 8.6926         | 397           | x                      |                           |
| esch       | 47.6873       | 8.7042         | 404           | x                      | x                         |
| etzw       | 47.6633       | 8.8055         | 430           | x                      |                           |
| flgu       | 47.4883       | 8.5338         | 436           |                        | x                         |
| fucu       | 47.4926       | 8.5300         | 438           |                        | x                         |
| grab       | 47.4910       | 8.5363         | 429           | x                      | x                         |
| grut       | 47.5617       | 8.9613         | 614           | x                      | x                         |
| gurw       | 47.5599       | 8.7477         | 490           | x                      | x                         |
| haup       | 47.4904       | 8.5350         | 434           |                        | x                         |
| hell       | 47.2959       | 8.8133         | 541           |                        | x                         |
| hiwi       | 47.2984       | 8.8169         | 559           | x                      | x                         |
| home       | 47.4690       | 8.5727         | 488           | x                      | x                         |
| hubs       | 47.3650       | 8.4745         | 628           | x                      |                           |
| hubw       | 47.3653       | 8.4725         | 631           | x                      | x                         |
| hund       | 47.3030       | 8.7774         | 509           |                        | x                         |
| insl       | 47.4956       | 8.5283         | 439           | x                      | x                         |
| isol       | 47.4988       | 8.5363         | 426           |                        | x                         |
| jmai       | 47.4931       | 8.5277         | 440           |                        | x                         |
| jnw1       | 47.4930       | 8.5273         | 440           | x                      | x                         |
| kebn       | 47.5419       | 8.7816         | 455           | x                      |                           |
| kzwi       | 47.5639       | 8.9739         | 650           | x                      | x                         |
| lang       | 47.5656       | 8.7621         | 472           | x                      | x                         |
| mosl       | 47.5910       | 8.9027         | 460           | x                      | x                         |
| mrbm       | 47.5431       | 8.7796         | 458           |                        | x                         |
| mrbn       | 47.5434       | 8.7793         | 458           |                        | x                         |
| mrbs       | 47.5426       | 8.7798         | 460           |                        | x                         |
| muet       | 47.4540       | 8.6045         | 458           | x                      | x                         |
| oloo       | 47.5768       | 8.7406         | 465           | x                      | x                         |
| opfi       | 47.5695       | 8.7417         | 515           | x                      | x                         |

---

|      |         |        |     |   |   |
|------|---------|--------|-----|---|---|
| oste | 47.5682 | 8.8733 | 385 | x |   |
| pfac | 47.6037 | 8.7439 | 470 | x |   |
| piro | 47.6897 | 8.7030 | 419 | x | x |
| rain | 47.5956 | 8.9231 | 428 | x |   |
| raue | 47.6126 | 8.6774 | 423 |   | x |
| rauw | 47.6131 | 8.6765 | 424 | x | x |
| rode | 47.6697 | 8.7744 | 529 | x |   |
| schl | 47.4646 | 8.5353 | 434 | x | x |
| seew | 47.3122 | 8.7705 | 514 | x |   |
| stru | 47.4808 | 8.6700 | 573 | x |   |
| sypf | 47.4356 | 8.6141 | 470 | x |   |
| untr | 47.3970 | 8.5658 | 591 | x |   |
| weck | 47.5929 | 8.9000 | 455 | x |   |
| whof | 47.6250 | 8.6862 | 401 | x |   |
| wolf | 47.5654 | 8.9799 | 662 | x | x |
| wtal | 47.5003 | 8.6716 | 475 | x | x |
| zaun | 47.6120 | 8.6746 | 423 | x |   |
| zurl | 47.3893 | 8.5617 | 645 | x | x |
| zurs | 47.3892 | 8.5613 | 645 | x | x |

---

**Table S2.** Diagnostic statistics for microsatellite loci used to estimate *Rana temporaria* population divergence. The table includes two parts. Part 1 shows population-level statistics for the eight loci, one of which was discarded from later analyses. For each locus, values are reported for the number of tadpoles scored (N), the number of alleles present not including null alleles (A), observed and expected heterozygosity (Ho and He) calculated without accounting for null alleles, and estimated null allele frequency (NAF; eqn. 2 in Brookfield 1996, *Molecular Ecology* 5:453-455). I estimated null allele frequencies because deviation from Hardy-Weinberg equilibrium was in some cases significant when checked with exact probability tests (Guo & Thompson 1992, *Biometrics* 48:361-372; implemented in GENEPOP 4.0.10). For all subsequent analyses, I adjusted allele frequencies at the population level, introducing one new allele under the assumption that all allelic dropout arose from a single null. Part 2 reports population means for A, Ho, and He after correcting for null alleles.

### **Part 1**

| Population          | N  | A | Ho    | He    | NAF    |
|---------------------|----|---|-------|-------|--------|
| <u>Locus RtCa22</u> |    |   |       |       |        |
| allm                | 18 | 2 | 0.167 | 0.157 | -0.009 |
| alls                | 18 | 2 | 0.000 | 0.108 | 0.097  |
| amb3                | 20 | 2 | 0.050 | 0.050 | 0      |
| anni                | 19 | 1 | 0.000 | 0.000 | 0      |
| awma                | 23 | 1 | 0.000 | 0.000 | 0      |
| birk                | 19 | 1 | 0.000 | 0.000 | 0      |
| bode                | 20 | 3 | 0.100 | 0.188 | 0.074  |
| chaf                | 18 | 2 | 0.056 | 0.056 | 0      |
| chap                | 19 | 1 | 0.000 | 0.000 | 0      |
| eige                | 17 | 2 | 0.059 | 0.059 | 0      |
| ente                | 22 | 1 | 0.000 | 0.000 | 0      |
| eroa                | 10 | 1 | 0.000 | 0.000 | 0      |
| esch                | 23 | 2 | 0.000 | 0.085 | 0.078  |
| etzw                | 20 | 1 | 0.000 | 0.000 | 0      |
| grab                | 21 | 2 | 0.000 | 0.093 | 0.085  |
| grut                | 21 | 4 | 0.095 | 0.403 | 0.220  |
| gurw                | 25 | 2 | 0.120 | 0.115 | -0.004 |
| hiwi                | 19 | 1 | 0.000 | 0.000 | 0      |
| home                | 22 | 2 | 0.091 | 0.089 | -0.002 |
| hubs                | 1  | 1 | 0.000 | 0.000 | 0      |
| hubw                | 5  | 1 | 0.000 | 0.000 | 0      |
| insl                | 19 | 2 | 0.158 | 0.149 | -0.008 |
| jnw1                | 19 | 2 | 0.053 | 0.053 | 0      |
| kebn                | 18 | 1 | 0.000 | 0.000 | 0      |
| kzwi                | 19 | 1 | 0.000 | 0.000 | 0      |
| lang                | 22 | 1 | 0.000 | 0.000 | 0      |
| mosl                | 22 | 2 | 0.045 | 0.045 | 0      |
| muet                | 21 | 2 | 0.048 | 0.048 | 0      |
| oloo                | 24 | 4 | 0.125 | 0.122 | -0.003 |

|                |      |   |       |       |        |
|----------------|------|---|-------|-------|--------|
| opfi           | 24   | 1 | 0.000 | 0.000 | 0      |
| oste           | 19   | 1 | 0.000 | 0.000 | 0      |
| pfac           | 23   | 4 | 0.174 | 0.167 | -0.006 |
| piro           | 19   | 2 | 0.053 | 0.053 | 0      |
| rain           | 22   | 3 | 0.091 | 0.090 | -0.001 |
| rauw           | 21   | 2 | 0.048 | 0.048 | 0      |
| rode           | 14   | 1 | 0.000 | 0.000 | 0      |
| schl           | 24   | 1 | 0.000 | 0.000 | 0      |
| seew           | 21   | 1 | 0.000 | 0.000 | 0      |
| stru           | 25   | 1 | 0.000 | 0.000 | 0      |
| sypf           | 17   | 2 | 0.118 | 0.114 | -0.004 |
| untr           | 21   | 3 | 0.143 | 0.138 | -0.004 |
| weck           | 12   | 1 | 0.000 | 0.000 | 0      |
| whof           | 30   | 1 | 0.000 | 0.000 | 0      |
| wolf           | 16   | 3 | 0.125 | 0.232 | 0.087  |
| wtal           | 21   | 1 | 0.000 | 0.000 | 0      |
| zaun           | 18   | 1 | 0.000 | 0.000 | 0      |
| zurl           | 19   | 3 | 0.105 | 0.104 | -0.001 |
| zurs           | 19   | 3 | 0.158 | 0.152 | -0.005 |
| <u>average</u> | 19.1 |   | 0.045 | 0.062 | 0.014  |

Locus RtCa2-22

|      |    |   |       |       |        |
|------|----|---|-------|-------|--------|
| allm | 15 | 6 | 0.733 | 0.662 | -0.043 |
| alls | 12 | 6 | 0.667 | 0.768 | 0.057  |
| amb3 | 19 | 8 | 0.526 | 0.733 | 0.119  |
| anni | 13 | 6 | 0.769 | 0.766 | -0.002 |
| awma | 19 | 7 | 0.632 | 0.688 | 0.033  |
| birk | 16 | 8 | 0.688 | 0.800 | 0.062  |
| bode | 15 | 8 | 0.467 | 0.669 | 0.121  |
| chaf | 10 | 8 | 0.600 | 0.789 | 0.106  |
| chap | 11 | 5 | 0.455 | 0.766 | 0.176  |
| pfac | 14 | 8 | 0.643 | 0.751 | 0.062  |
| eige | 5  | 5 | 0.400 | 0.711 | 0.182  |
| ente | 14 | 5 | 0.500 | 0.585 | 0.054  |
| eroa | 10 | 3 | 0.400 | 0.442 | 0.029  |
| esch | 19 | 5 | 0.526 | 0.485 | -0.028 |
| etzw | 16 | 7 | 0.688 | 0.661 | -0.016 |
| grab | 18 | 8 | 0.500 | 0.805 | 0.169  |
| grut | 16 | 7 | 0.563 | 0.607 | 0.027  |
| gurw | 17 | 7 | 0.765 | 0.709 | -0.033 |
| hiwi | 16 | 7 | 0.563 | 0.716 | 0.089  |
| home | 9  | 4 | 0.444 | 0.647 | 0.123  |
| hubs | 10 | 6 | 0.900 | 0.774 | -0.071 |
| hubw | 19 | 8 | 0.421 | 0.777 | 0.200  |
| insl | 17 | 5 | 0.588 | 0.663 | 0.045  |
| jnw1 | 16 | 4 | 0.625 | 0.613 | -0.007 |
| kebn | 11 | 7 | 0.818 | 0.788 | -0.017 |
| kzwi | 16 | 6 | 0.438 | 0.647 | 0.127  |
| lang | 20 | 7 | 0.850 | 0.783 | -0.038 |
| mosl | 19 | 8 | 0.737 | 0.751 | 0.008  |
| muet | 18 | 5 | 0.389 | 0.551 | 0.104  |
| oloo | 20 | 7 | 0.700 | 0.710 | 0.006  |
| opfi | 14 | 8 | 0.929 | 0.767 | -0.092 |
| oste | 18 | 8 | 0.722 | 0.786 | 0.036  |
| piro | 9  | 5 | 1.000 | 0.673 | -0.195 |
| rain | 17 | 4 | 0.588 | 0.599 | 0.007  |
| rauw | 14 | 5 | 0.357 | 0.563 | 0.132  |

|                |      |   |       |       |        |
|----------------|------|---|-------|-------|--------|
| rode           | 9    | 6 | 0.667 | 0.693 | 0.015  |
| schl           | 14   | 6 | 0.643 | 0.603 | -0.025 |
| seew           | 18   | 7 | 0.611 | 0.622 | 0.007  |
| stru           | 17   | 5 | 0.471 | 0.469 | -0.001 |
| sypf           | 10   | 5 | 0.700 | 0.595 | -0.066 |
| untr           | 18   | 6 | 0.833 | 0.811 | -0.012 |
| weck           | 17   | 9 | 0.765 | 0.786 | 0.012  |
| whof           | 32   | 5 | 0.594 | 0.622 | 0.017  |
| wolf           | 17   | 5 | 0.706 | 0.640 | -0.040 |
| wtal           | 15   | 7 | 0.733 | 0.667 | -0.040 |
| zaun           | 14   | 4 | 0.714 | 0.521 | -0.127 |
| zurl           | 13   | 6 | 0.385 | 0.732 | 0.200  |
| zurs           | 9    | 6 | 0.333 | 0.765 | 0.245  |
| <u>average</u> | 14.8 |   | 0.626 | 0.686 | 0.034  |

Locus RtCa9 (discarded from analyses; see figure below)

|      |    |    |       |       |        |
|------|----|----|-------|-------|--------|
| allm | 18 | 7  | 0.389 | 0.708 | 0.187  |
| alls | 18 | 10 | 0.833 | 0.852 | 0.010  |
| amb3 | 21 | 9  | 0.762 | 0.789 | 0.015  |
| anni | 19 | 7  | 0.684 | 0.745 | 0.035  |
| awma | 23 | 9  | 0.565 | 0.643 | 0.047  |
| birk | 19 | 10 | 0.947 | 0.829 | -0.065 |
| bode | 20 | 5  | 0.600 | 0.581 | -0.012 |
| chaf | 19 | 8  | 0.789 | 0.765 | -0.014 |
| chap | 21 | 11 | 0.762 | 0.815 | 0.029  |
| pfac | 22 | 6  | 0.591 | 0.541 | -0.032 |
| eige | 15 | 7  | 0.667 | 0.763 | 0.054  |
| ente | 9  | 4  | 0.222 | 0.399 | 0.127  |
| eroa | 7  | 5  | 0.714 | 0.659 | -0.033 |
| esch | 19 | 6  | 0.526 | 0.744 | 0.125  |
| etzw | 18 | 8  | 0.333 | 0.830 | 0.272  |
| grab | 16 | 6  | 0.375 | 0.661 | 0.172  |
| grut | 19 | 8  | 0.474 | 0.787 | 0.175  |
| gurw | 22 | 7  | 0.545 | 0.550 | 0.003  |
| hiwi | 18 | 7  | 0.611 | 0.757 | 0.083  |
| home | 20 | 11 | 0.650 | 0.842 | 0.104  |
| hubs | 18 | 7  | 0.389 | 0.663 | 0.165  |
| hubw | 21 | 7  | 0.381 | 0.724 | 0.199  |
| insl | 17 | 5  | 0.176 | 0.701 | 0.309  |
| jnw1 | 18 | 4  | 0.611 | 0.494 | -0.078 |
| kebn | 13 | 6  | 0.615 | 0.606 | -0.006 |
| kzwi | 15 | 9  | 0.600 | 0.846 | 0.133  |
| lang | 20 | 8  | 0.450 | 0.612 | 0.100  |
| mosl | 23 | 6  | 0.130 | 0.702 | 0.336  |
| muet | 16 | 10 | 0.875 | 0.768 | -0.061 |
| oloo | 22 | 9  | 0.636 | 0.689 | 0.031  |
| opfi | 24 | 6  | 0.375 | 0.429 | 0.038  |
| oste | 13 | 9  | 0.769 | 0.874 | 0.056  |
| piro | 20 | 8  | 0.750 | 0.741 | -0.005 |
| rain | 18 | 10 | 0.778 | 0.871 | 0.050  |
| rauw | 21 | 9  | 0.762 | 0.735 | -0.016 |
| rode | 13 | 6  | 0.615 | 0.751 | 0.078  |
| schl | 23 | 9  | 0.609 | 0.646 | 0.022  |
| seew | 21 | 9  | 0.810 | 0.660 | -0.090 |
| stru | 19 | 11 | 0.737 | 0.787 | 0.028  |
| sypf | 16 | 6  | 0.750 | 0.776 | 0.015  |
| untr | 21 | 10 | 0.714 | 0.828 | 0.062  |

|                |      |    |       |       |        |
|----------------|------|----|-------|-------|--------|
| weck           | 14   | 7  | 0.071 | 0.817 | 0.411  |
| whof           | 33   | 9  | 0.697 | 0.758 | 0.035  |
| wolf           | 19   | 9  | 0.579 | 0.799 | 0.122  |
| wtal           | 21   | 9  | 0.667 | 0.576 | -0.058 |
| zaun           | 17   | 8  | 0.588 | 0.743 | 0.089  |
| zurl           | 13   | 3  | 0.308 | 0.532 | 0.146  |
| zurs           | 17   | 10 | 0.588 | 0.651 | 0.038  |
| <u>average</u> | 18.2 |    | 0.572 | 0.706 | 0.078  |

Locus RtCa30

|      |    |    |       |       |        |
|------|----|----|-------|-------|--------|
| allm | 18 | 11 | 0.667 | 0.854 | 0.101  |
| alls | 17 | 8  | 0.118 | 0.807 | 0.381  |
| amb3 | 19 | 8  | 0.421 | 0.745 | 0.186  |
| anni | 18 | 7  | 0.333 | 0.644 | 0.189  |
| awma | 18 | 8  | 0.167 | 0.875 | 0.378  |
| birk | 15 | 9  | 0.467 | 0.802 | 0.186  |
| bode | 14 | 8  | 0.357 | 0.852 | 0.267  |
| chaf | 17 | 6  | 0.412 | 0.681 | 0.160  |
| chap | 18 | 8  | 0.500 | 0.784 | 0.159  |
| pfac | 22 | 12 | 0.636 | 0.819 | 0.101  |
| eige | 13 | 7  | 0.538 | 0.745 | 0.119  |
| ente | 17 | 6  | 0.353 | 0.804 | 0.250  |
| eroa | 8  | 5  | 0.250 | 0.667 | 0.250  |
| esch | 20 | 8  | 0.500 | 0.826 | 0.179  |
| etzw | 16 | 10 | 0.438 | 0.800 | 0.201  |
| grab | 16 | 11 | 0.375 | 0.849 | 0.256  |
| grut | 15 | 10 | 0.467 | 0.887 | 0.223  |
| gurw | 24 | 9  | 0.375 | 0.838 | 0.252  |
| hiwi | 19 | 6  | 0.421 | 0.632 | 0.129  |
| home | 21 | 9  | 0.619 | 0.848 | 0.124  |
| hubs | 20 | 9  | 0.350 | 0.710 | 0.211  |
| hubw | 20 | 12 | 0.450 | 0.865 | 0.223  |
| insl | 17 | 8  | 0.412 | 0.750 | 0.193  |
| jnw1 | 15 | 6  | 0.267 | 0.506 | 0.159  |
| kebn | 6  | 3  | 0.500 | 0.439 | -0.042 |
| kzwi | 16 | 9  | 0.625 | 0.841 | 0.117  |
| lang | 21 | 9  | 0.619 | 0.800 | 0.101  |
| mosl | 17 | 9  | 0.235 | 0.824 | 0.323  |
| muet | 19 | 10 | 0.526 | 0.767 | 0.136  |
| oloo | 23 | 8  | 0.435 | 0.611 | 0.109  |
| opfi | 23 | 8  | 0.304 | 0.703 | 0.234  |
| oste | 16 | 8  | 0.500 | 0.825 | 0.178  |
| piro | 16 | 7  | 0.375 | 0.750 | 0.214  |
| rain | 18 | 7  | 0.611 | 0.762 | 0.086  |
| rauw | 21 | 8  | 0.286 | 0.806 | 0.288  |
| rode | 10 | 7  | 0.400 | 0.842 | 0.240  |
| schl | 22 | 9  | 0.273 | 0.832 | 0.305  |
| seew | 17 | 9  | 0.235 | 0.786 | 0.309  |
| stru | 22 | 9  | 0.364 | 0.809 | 0.246  |
| sypf | 14 | 9  | 0.214 | 0.862 | 0.348  |
| untr | 19 | 7  | 0.316 | 0.673 | 0.213  |
| weck | 19 | 7  | 0.421 | 0.829 | 0.223  |
| whof | 32 | 11 | 0.531 | 0.854 | 0.174  |
| wolf | 15 | 8  | 0.333 | 0.834 | 0.273  |
| wtal | 18 | 8  | 0.333 | 0.816 | 0.266  |
| zaun | 17 | 8  | 0.294 | 0.802 | 0.282  |
| zurl | 17 | 7  | 0.412 | 0.734 | 0.186  |

|                |      |   |       |       |       |
|----------------|------|---|-------|-------|-------|
| zurs           | 17   | 9 | 0.529 | 0.701 | 0.101 |
| <u>average</u> | 17.5 |   | 0.406 | 0.768 | 0.203 |

Locus RtCa2-28

|                |      |    |       |       |        |
|----------------|------|----|-------|-------|--------|
| allm           | 18   | 9  | 0.667 | 0.817 | 0.083  |
| alls           | 16   | 9  | 0.563 | 0.817 | 0.140  |
| amb3           | 21   | 6  | 0.381 | 0.748 | 0.210  |
| anni           | 17   | 6  | 0.471 | 0.697 | 0.133  |
| awma           | 23   | 9  | 0.478 | 0.697 | 0.129  |
| birk           | 18   | 7  | 0.556 | 0.784 | 0.128  |
| bode           | 20   | 7  | 0.550 | 0.797 | 0.137  |
| chaf           | 16   | 9  | 0.563 | 0.847 | 0.154  |
| chap           | 14   | 6  | 0.357 | 0.804 | 0.248  |
| pfac           | 18   | 6  | 0.278 | 0.798 | 0.289  |
| eige           | 17   | 9  | 0.588 | 0.865 | 0.149  |
| ente           | 19   | 8  | 0.579 | 0.791 | 0.118  |
| eroa           | 10   | 8  | 0.900 | 0.853 | -0.025 |
| esch           | 18   | 8  | 0.500 | 0.813 | 0.173  |
| etzw           | 14   | 7  | 0.429 | 0.812 | 0.211  |
| grab           | 21   | 7  | 0.667 | 0.749 | 0.047  |
| grut           | 16   | 6  | 0.250 | 0.659 | 0.247  |
| gurw           | 25   | 9  | 0.560 | 0.755 | 0.111  |
| hiwi           | 20   | 10 | 0.500 | 0.878 | 0.201  |
| home           | 21   | 7  | 0.429 | 0.799 | 0.206  |
| hubs           | 21   | 6  | 0.524 | 0.751 | 0.130  |
| hubw           | 24   | 8  | 0.667 | 0.772 | 0.059  |
| insl           | 14   | 7  | 0.643 | 0.783 | 0.079  |
| jnw1           | 18   | 8  | 0.667 | 0.606 | -0.038 |
| kebn           | 17   | 8  | 0.353 | 0.838 | 0.264  |
| kzwi           | 17   | 6  | 0.176 | 0.713 | 0.313  |
| lang           | 20   | 8  | 0.600 | 0.812 | 0.117  |
| mosl           | 14   | 7  | 0.286 | 0.772 | 0.274  |
| muet           | 19   | 6  | 0.684 | 0.667 | -0.010 |
| oloo           | 24   | 10 | 0.625 | 0.784 | 0.089  |
| opfi           | 21   | 9  | 0.762 | 0.830 | 0.037  |
| oste           | 18   | 7  | 0.333 | 0.849 | 0.279  |
| piro           | 19   | 7  | 0.789 | 0.832 | 0.023  |
| rain           | 18   | 3  | 0.333 | 0.656 | 0.195  |
| rauw           | 9    | 5  | 0.889 | 0.771 | -0.067 |
| rode           | 8    | 6  | 0.500 | 0.783 | 0.159  |
| schl           | 22   | 8  | 0.545 | 0.815 | 0.149  |
| seew           | 10   | 6  | 0.400 | 0.726 | 0.189  |
| stru           | 22   | 8  | 0.682 | 0.683 | 0.001  |
| sypf           | 15   | 7  | 0.467 | 0.630 | 0.100  |
| untr           | 21   | 7  | 0.429 | 0.702 | 0.160  |
| weck           | 13   | 5  | 0.231 | 0.778 | 0.308  |
| whof           | 13   | 5  | 0.308 | 0.815 | 0.279  |
| wolf           | 18   | 5  | 0.111 | 0.673 | 0.336  |
| wtal           | 20   | 7  | 0.750 | 0.810 | 0.033  |
| zaun           | 14   | 6  | 0.500 | 0.683 | 0.109  |
| zurl           | 18   | 7  | 0.500 | 0.735 | 0.135  |
| zurs           | 16   | 8  | 0.500 | 0.716 | 0.126  |
| <u>average</u> | 17.4 |    | 0.516 | 0.764 | 0.140  |

Locus Rtempu8

|      |    |   |       |       |        |
|------|----|---|-------|-------|--------|
| allm | 18 | 9 | 0.778 | 0.681 | -0.058 |
| alls | 15 | 5 | 0.200 | 0.409 | 0.148  |

|                |      |    |       |       |        |
|----------------|------|----|-------|-------|--------|
| amb3           | 21   | 9  | 0.571 | 0.706 | 0.079  |
| anni           | 19   | 9  | 0.368 | 0.684 | 0.188  |
| awma           | 21   | 10 | 0.381 | 0.490 | 0.073  |
| birk           | 18   | 10 | 0.556 | 0.683 | 0.075  |
| bode           | 15   | 5  | 0.133 | 0.361 | 0.168  |
| chaf           | 18   | 9  | 0.556 | 0.675 | 0.071  |
| chap           | 20   | 7  | 0.450 | 0.465 | 0.010  |
| pfac           | 22   | 8  | 0.636 | 0.555 | -0.052 |
| eige           | 16   | 7  | 0.438 | 0.520 | 0.054  |
| ente           | 21   | 10 | 0.571 | 0.578 | 0.004  |
| eroa           | 10   | 5  | 0.500 | 0.511 | 0.007  |
| esch           | 21   | 11 | 0.857 | 0.736 | -0.070 |
| etzw           | 18   | 10 | 0.667 | 0.711 | 0.026  |
| grab           | 21   | 8  | 0.524 | 0.487 | -0.025 |
| grut           | 21   | 7  | 0.571 | 0.630 | 0.036  |
| gurw           | 23   | 5  | 0.435 | 0.410 | -0.018 |
| hiwi           | 19   | 4  | 0.158 | 0.154 | -0.003 |
| home           | 21   | 12 | 0.667 | 0.692 | 0.015  |
| hubs           | 21   | 11 | 0.762 | 0.746 | -0.009 |
| hubw           | 24   | 10 | 0.458 | 0.469 | 0.007  |
| insl           | 21   | 8  | 0.524 | 0.685 | 0.096  |
| jnw1           | 19   | 6  | 0.632 | 0.579 | -0.034 |
| kebn           | 18   | 7  | 0.333 | 0.433 | 0.070  |
| kzwi           | 19   | 9  | 0.632 | 0.597 | -0.022 |
| lang           | 21   | 7  | 0.429 | 0.382 | -0.034 |
| mosl           | 22   | 12 | 0.727 | 0.770 | 0.024  |
| muet           | 20   | 8  | 0.600 | 0.533 | -0.044 |
| oloo           | 20   | 10 | 0.650 | 0.605 | -0.028 |
| opfi           | 20   | 7  | 0.200 | 0.436 | 0.164  |
| oste           | 21   | 13 | 0.762 | 0.791 | 0.016  |
| piro           | 17   | 6  | 0.294 | 0.371 | 0.056  |
| rain           | 21   | 11 | 0.667 | 0.626 | -0.025 |
| rauw           | 21   | 9  | 0.667 | 0.678 | 0.007  |
| rode           | 8    | 6  | 0.500 | 0.617 | 0.072  |
| schl           | 24   | 10 | 0.750 | 0.672 | -0.047 |
| seew           | 17   | 7  | 0.471 | 0.570 | 0.063  |
| stru           | 21   | 6  | 0.238 | 0.381 | 0.104  |
| sypf           | 14   | 9  | 0.714 | 0.728 | 0.008  |
| untr           | 21   | 10 | 0.810 | 0.744 | -0.038 |
| weck           | 20   | 9  | 0.550 | 0.771 | 0.125  |
| whof           | 33   | 10 | 0.515 | 0.740 | 0.129  |
| wolf           | 18   | 7  | 0.556 | 0.537 | -0.012 |
| wtal           | 21   | 9  | 0.476 | 0.490 | 0.009  |
| zaun           | 18   | 9  | 0.611 | 0.651 | 0.024  |
| zurl           | 19   | 10 | 0.737 | 0.687 | -0.030 |
| zurs           | 19   | 11 | 0.684 | 0.727 | 0.025  |
| <u>average</u> | 19.3 |    | 0.542 | 0.583 | 0.027  |

Locus Rtempu7

|      |    |   |       |       |       |
|------|----|---|-------|-------|-------|
| allm | 15 | 7 | 0.467 | 0.777 | 0.174 |
| alls | 7  | 4 | 0.571 | 0.648 | 0.047 |
| amb3 | 14 | 8 | 0.643 | 0.828 | 0.101 |
| anni | 17 | 8 | 0.353 | 0.759 | 0.231 |
| awma | 22 | 7 | 0.591 | 0.816 | 0.124 |
| birk | 19 | 7 | 0.421 | 0.733 | 0.180 |
| bode | 10 | 5 | 0.500 | 0.789 | 0.162 |
| chaf | 16 | 4 | 0.438 | 0.448 | 0.007 |



|                |      |    |       |       |        |
|----------------|------|----|-------|-------|--------|
| chap           | 13   | 7  | 0.538 | 0.806 | 0.148  |
| pfac           | 19   | 8  | 0.474 | 0.842 | 0.200  |
| eige           | 11   | 5  | 0.364 | 0.563 | 0.127  |
| ente           | 15   | 6  | 0.600 | 0.671 | 0.042  |
| eroa           | 6    | 5  | 0.667 | 0.833 | 0.091  |
| esch           | 21   | 10 | 0.810 | 0.800 | -0.006 |
| etzw           | 16   | 8  | 0.500 | 0.728 | 0.132  |
| grab           | 16   | 7  | 0.563 | 0.720 | 0.091  |
| grut           | 16   | 10 | 0.875 | 0.841 | -0.018 |
| gurw           | 22   | 10 | 0.909 | 0.756 | -0.087 |
| hiwi           | 18   | 9  | 0.667 | 0.697 | 0.018  |
| home           | 12   | 7  | 0.500 | 0.761 | 0.148  |
| hubs           | 20   | 10 | 0.850 | 0.728 | -0.071 |
| hubw           | 25   | 8  | 0.800 | 0.826 | 0.014  |
| insl           | 21   | 10 | 0.762 | 0.864 | 0.055  |
| jnw1           | 19   | 11 | 0.684 | 0.841 | 0.085  |
| kebn           | 17   | 10 | 0.941 | 0.875 | -0.035 |
| kzwi           | 20   | 10 | 0.650 | 0.795 | 0.081  |
| lang           | 18   | 10 | 0.778 | 0.762 | -0.009 |
| mosl           | 19   | 9  | 0.737 | 0.802 | 0.036  |
| muet           | 18   | 7  | 0.556 | 0.670 | 0.068  |
| oloo           | 22   | 9  | 0.591 | 0.768 | 0.100  |
| opfi           | 23   | 12 | 0.783 | 0.851 | 0.037  |
| oste           | 21   | 7  | 0.524 | 0.776 | 0.142  |
| piro           | 19   | 7  | 0.895 | 0.828 | -0.037 |
| rain           | 20   | 9  | 0.550 | 0.735 | 0.107  |
| rauw           | 19   | 8  | 0.789 | 0.775 | -0.008 |
| rode           | 8    | 6  | 0.625 | 0.767 | 0.080  |
| schl           | 23   | 9  | 0.478 | 0.594 | 0.073  |
| seew           | 16   | 4  | 0.188 | 0.506 | 0.211  |
| stru           | 12   | 7  | 0.500 | 0.645 | 0.088  |
| sypf           | 14   | 5  | 0.643 | 0.751 | 0.062  |
| untr           | 19   | 9  | 0.842 | 0.797 | -0.025 |
| weck           | 18   | 9  | 0.778 | 0.800 | 0.012  |
| whof           | 31   | 10 | 0.581 | 0.776 | 0.110  |
| wolf           | 18   | 8  | 0.500 | 0.756 | 0.146  |
| wtal           | 19   | 6  | 0.632 | 0.720 | 0.051  |
| zaun           | 18   | 10 | 0.778 | 0.789 | 0.006  |
| zurl           | 14   | 8  | 0.643 | 0.783 | 0.079  |
| zurs           | 11   | 8  | 0.364 | 0.779 | 0.233  |
| <u>average</u> | 17.1 |    | 0.614 | 0.751 | 0.079  |

Locus RtCa25

|      |    |    |       |       |        |
|------|----|----|-------|-------|--------|
| allm | 16 | 10 | 0.688 | 0.837 | 0.081  |
| alls | 12 | 6  | 0.583 | 0.783 | 0.112  |
| amb3 | 3  | 3  | 1.000 | 0.733 | -0.154 |
| anni | 13 | 8  | 0.462 | 0.754 | 0.166  |
| awma | 22 | 16 | 0.864 | 0.922 | 0.030  |
| birk | 16 | 8  | 0.500 | 0.819 | 0.175  |
| bode | 20 | 12 | 0.450 | 0.883 | 0.230  |
| chaf | 15 | 12 | 0.733 | 0.869 | 0.073  |
| chap | 18 | 13 | 0.611 | 0.892 | 0.149  |
| pfac | 16 | 12 | 0.750 | 0.913 | 0.085  |
| eige | 12 | 8  | 0.500 | 0.786 | 0.160  |
| ente | 17 | 9  | 0.529 | 0.859 | 0.178  |
| eroa | 9  | 7  | 0.778 | 0.837 | 0.032  |
| esch | 21 | 14 | 0.857 | 0.892 | 0.018  |

|                |      |    |       |       |        |
|----------------|------|----|-------|-------|--------|
| etzw           | 18   | 10 | 0.833 | 0.875 | 0.022  |
| grab           | 19   | 14 | 0.947 | 0.925 | -0.011 |
| grut           | 18   | 12 | 0.944 | 0.854 | -0.049 |
| gurw           | 23   | 13 | 0.696 | 0.905 | 0.110  |
| hiwi           | 14   | 15 | 0.786 | 0.931 | 0.075  |
| home           | 9    | 8  | 0.556 | 0.902 | 0.182  |
| hubs           | 13   | 13 | 0.538 | 0.948 | 0.210  |
| hubw           | 23   | 14 | 0.652 | 0.831 | 0.098  |
| insl           | 18   | 8  | 0.667 | 0.763 | 0.054  |
| jnw1           | 19   | 10 | 0.632 | 0.826 | 0.106  |
| kebn           | 17   | 17 | 0.941 | 0.950 | 0.005  |
| kzwi           | 21   | 14 | 0.810 | 0.877 | 0.036  |
| lang           | 22   | 12 | 0.773 | 0.845 | 0.039  |
| mosl           | 20   | 15 | 0.750 | 0.918 | 0.088  |
| muet           | 12   | 8  | 0.500 | 0.764 | 0.150  |
| oloo           | 22   | 13 | 0.818 | 0.888 | 0.037  |
| opfi           | 18   | 13 | 0.500 | 0.916 | 0.217  |
| oste           | 19   | 15 | 0.842 | 0.879 | 0.020  |
| piro           | 16   | 11 | 0.500 | 0.859 | 0.193  |
| rain           | 22   | 14 | 0.909 | 0.910 | 0.001  |
| rauw           | 20   | 9  | 0.750 | 0.859 | 0.059  |
| rode           | 10   | 11 | 0.500 | 0.895 | 0.208  |
| schl           | 22   | 18 | 0.682 | 0.927 | 0.127  |
| seew           | 21   | 13 | 0.667 | 0.893 | 0.119  |
| stru           | 7    | 6  | 0.286 | 0.879 | 0.316  |
| sypf           | 15   | 12 | 0.733 | 0.846 | 0.061  |
| untr           | 19   | 11 | 0.789 | 0.903 | 0.060  |
| weck           | 8    | 9  | 0.500 | 0.917 | 0.218  |
| whof           | 24   | 12 | 0.708 | 0.850 | 0.077  |
| wolf           | 12   | 10 | 0.667 | 0.866 | 0.107  |
| wtal           | 19   | 13 | 0.684 | 0.885 | 0.107  |
| zaun           | 14   | 8  | 0.714 | 0.775 | 0.034  |
| zurl           | 16   | 11 | 0.688 | 0.847 | 0.086  |
| zurs           | 17   | 11 | 0.765 | 0.852 | 0.047  |
| <u>average</u> | 16.5 |    | 0.689 | 0.867 | 0.095  |

---

## Part 2

| Population | Population averages |      |      |
|------------|---------------------|------|------|
|            | A                   | Ho   | He   |
| allm       | 8.1                 | 0.63 | 0.70 |
| alls       | 6.6                 | 0.44 | 0.69 |
| amb3       | 6.9                 | 0.57 | 0.67 |
| anni       | 7.0                 | 0.45 | 0.66 |
| awma       | 9.0                 | 0.51 | 0.67 |
| birk       | 7.9                 | 0.52 | 0.70 |
| bode       | 7.7                 | 0.44 | 0.70 |
| chaf       | 7.7                 | 0.51 | 0.65 |
| chap       | 7.3                 | 0.47 | 0.67 |

---

|      |     |      |      |
|------|-----|------|------|
| pfac | 8.9 | 0.58 | 0.71 |
| eige | 6.9 | 0.56 | 0.66 |
| ente | 7.0 | 0.49 | 0.64 |
| eroa | 4.9 | 0.49 | 0.61 |
| esch | 8.6 | 0.51 | 0.68 |
| etzw | 8.0 | 0.61 | 0.68 |
| grab | 8.7 | 0.54 | 0.70 |
| grut | 8.4 | 0.56 | 0.73 |
| gurw | 8.1 | 0.60 | 0.65 |
| hiwi | 7.9 | 0.59 | 0.60 |
| home | 7.6 | 0.48 | 0.71 |
| hubs | 8.3 | 0.54 | 0.67 |
| hubw | 9.1 | 0.69 | 0.67 |
| insl | 7.4 | 0.53 | 0.70 |
| jnw1 | 7.0 | 0.56 | 0.60 |
| kebn | 7.9 | 0.55 | 0.66 |
| kzwi | 8.4 | 0.58 | 0.67 |
| lang | 8.0 | 0.53 | 0.63 |
| mosl | 9.3 | 0.59 | 0.71 |
| muet | 7.0 | 0.55 | 0.61 |
| oloo | 9.1 | 0.51 | 0.66 |
| opfi | 8.7 | 0.59 | 0.67 |
| oste | 8.9 | 0.55 | 0.72 |
| piro | 6.7 | 0.58 | 0.65 |
| rain | 7.6 | 0.57 | 0.65 |
| rauw | 7.0 | 0.55 | 0.67 |
| rode | 6.7 | 0.51 | 0.70 |
| schl | 9.1 | 0.52 | 0.65 |
| seew | 7.3 | 0.43 | 0.63 |
| stru | 6.4 | 0.42 | 0.57 |
| sypf | 7.4 | 0.54 | 0.67 |
| untr | 7.9 | 0.62 | 0.70 |
| weck | 7.4 | 0.55 | 0.71 |
| whof | 8.3 | 0.51 | 0.68 |
| wolf | 7.1 | 0.52 | 0.69 |
| wtal | 7.6 | 0.54 | 0.64 |
| zaun | 6.7 | 0.54 | 0.62 |
| zurl | 8.0 | 0.54 | 0.69 |
| zurs | 8.6 | 0.55 | 0.71 |

---

**Table S3.** The number of non-null alleles ( $A$ ) occurring at each locus for *Rana temporaria*, along with measures of population divergence ( $F_{ST}$ ; allele identity method of Cockerham, 1973, *Genetics* 74:679-700) and inbreeding ( $F_{IS}$ ), calculated in GENEPOP 4.0.10 under the assumption that a single null allele exists.

| Locus                 | $A$ | $F_{ST}$ | $F_{IS}$ | Reference**             |
|-----------------------|-----|----------|----------|-------------------------|
| RtCa22                | 6   | 0.041    | 0.217    | Primmer & Merilä 2002   |
| RtCa2-22              | 12  | 0.035    | 0.097    | Teacher et al. 2009     |
| RtCa9*                | 24  | 0.083    | 0.164    | Garner & Tomio 2001     |
| RtCa30                | 20  | 0.022    | 0.407    | Teacher et al. 2009     |
| Rt2Ca2-28             | 16  | 0.029    | 0.279    | Teacher et al. 2009     |
| Rtemp $\mu$ 8         | 28  | 0.023    | 0.077    | Rowe & Beebee 2001      |
| Rtemp $\mu$ 7         | 20  | 0.021    | 0.142    | Rowe & Beebee 2001      |
| RtCa25                | 36  | 0.032    | 0.139    | Lesbarreres et al. 2005 |
| Average               |     | 0.036    | 0.193    |                         |
| Average without RtCa9 |     | 0.027    | 0.201    |                         |

\* Discarded from analyses because of evidence for selection (see Fig. S1).

\*\* References:

- Garner, T. W. J., and G. Tomio. 2001. Microsatellites for use in studies of the Italian Agile Frog, *Rana latastei*. *Conservation Genetics* 2:77-80.
- Lesbarreres, D., C. R. Primmer, A. Laurila, and J. Merilä. 2005. Environmental and population dependency of genetic variability-fitness correlations in *Rana temporaria*. *Molecular Ecology* 14:311-323.
- Primmer, C. R., and J. Merilä. 2002. A low rate of cross-species microsatellite amplification success in ranid frogs. *Conservation Genetics* 3:445-449.
- Rowe, G., and T. J. C. Beebee. 2001. Polymerase chain reaction primers for microsatellite loci in the common frog *Rana temporaria*. *Molecular Ecology Notes* 1:6-7.
- Teacher, A. G. F., T. W. J. Garner, and R. A. Nichols. 2009. Population genetic patterns suggest a behavioral change in wild common frogs (*Rana temporaria*) following disease outbreaks (Ranavirus). *Molecular Ecology* 18:3163-3172.

**Table S4.** Diagnostic statistics for microsatellite loci used to estimate *Triturus alpestris* population divergence. The table includes three parts. Part 1 shows population-level statistics for the seven loci. For each locus, values are reported for the number of larvae scored (N), the number of alleles present not including null alleles (A), observed and expected heterozygosity calculated without accounting for null alleles ( $H_o$  and  $H_e$ ), and estimated null allele frequency (NAF; eqn. 2 in Brookfield 1996, *Molecular Ecology* 5:453-455). I estimated null allele frequencies because deviation from Hardy-Weinberg equilibrium was in some cases significant when checked with exact probability tests (Guo & Thompson 1992, *Biometrics* 48:361-372; implemented in GENEPOP 4.0.10). For all subsequent analyses, I adjusted allele frequencies at the population level, introducing one new allele under the assumption that all allelic dropout arose from a single null.

Part 2 reports population means for A,  $H_o$ , and  $H_e$ .

Part 3 reports the number of non-null alleles (A) occurring at each locus, along with measures of population divergence ( $F_{ST}$ ; allele identity method of Cockerham [1973, *Genetics* 74:679-700] ) and inbreeding ( $F_{IS}$ ), calculated in GENEPOP under the assumption that a single null allele exists.

### **Part 1**

| Population          | N  | A | $H_o$ | $H_e$ | NAF   |
|---------------------|----|---|-------|-------|-------|
| <u>Locus Ta1Ca1</u> |    |   |       |       |       |
| allm                | 10 | 4 | 0.600 | 0.553 | 0.000 |
| alls                | 15 | 5 | 0.733 | 0.687 | 0.000 |
| amb1                | 20 | 7 | 0.500 | 0.617 | 0.072 |
| amb3                | 28 | 6 | 0.357 | 0.604 | 0.154 |
| amb4                | 19 | 5 | 0.474 | 0.587 | 0.071 |
| birk                | 9  | 3 | 0.556 | 0.542 | 0.000 |
| chap                | 23 | 3 | 0.273 | 0.406 | 0.095 |
| ente                | 20 | 4 | 0.316 | 0.397 | 0.058 |
| esch                | 19 | 2 | 0.316 | 0.273 | 0.000 |
| figu                | 19 | 4 | 0.526 | 0.539 | 0.008 |

|                |      |   |       |       |       |
|----------------|------|---|-------|-------|-------|
| fucu           | 20   | 4 | 0.300 | 0.347 | 0.035 |
| grab           | 42   | 4 | 0.634 | 0.552 | 0.000 |
| grut           | 6    | 2 | 0.500 | 0.530 | 0.020 |
| gurw           | 18   | 3 | 0.389 | 0.398 | 0.006 |
| haup           | 21   | 5 | 0.500 | 0.586 | 0.054 |
| hell           | 20   | 6 | 0.550 | 0.577 | 0.017 |
| hiwi           | 14   | 5 | 0.714 | 0.624 | 0.000 |
| home           | 23   | 6 | 0.609 | 0.614 | 0.003 |
| hubw           | 20   | 3 | 0.550 | 0.573 | 0.015 |
| hund           | 22   | 5 | 0.500 | 0.543 | 0.028 |
| insl           | 21   | 5 | 0.600 | 0.544 | 0.000 |
| isol           | 20   | 6 | 0.500 | 0.487 | 0.000 |
| jmai           | 17   | 5 | 0.412 | 0.497 | 0.057 |
| jnw1           | 20   | 2 | 0.500 | 0.431 | 0.000 |
| kzwi           | 18   | 5 | 0.500 | 0.605 | 0.065 |
| lang           | 20   | 7 | 0.474 | 0.549 | 0.048 |
| mosl           | 27   | 3 | 0.481 | 0.408 | 0.000 |
| mrbm           | 20   | 2 | 0.400 | 0.385 | 0.000 |
| mrbn           | 21   | 5 | 0.571 | 0.566 | 0.000 |
| mrbs           | 22   | 5 | 0.500 | 0.518 | 0.012 |
| muet           | 20   | 4 | 0.600 | 0.637 | 0.023 |
| oloo           | 20   | 5 | 0.400 | 0.491 | 0.061 |
| opfi           | 21   | 5 | 0.476 | 0.519 | 0.028 |
| piro           | 20   | 2 | 0.350 | 0.358 | 0.006 |
| raue           | 7    | 2 | 0.143 | 0.143 | 0.000 |
| rauw           | 53   | 5 | 0.321 | 0.371 | 0.036 |
| schl           | 19   | 3 | 0.471 | 0.469 | 0.000 |
| wolf           | 7    | 2 | 0.429 | 0.363 | 0.000 |
| wtal           | 18   | 4 | 0.611 | 0.529 | 0.000 |
| zurl           | 16   | 4 | 0.625 | 0.504 | 0.000 |
| zurs           | 21   | 4 | 0.333 | 0.417 | 0.059 |
| <u>average</u> | 19.9 |   | 0.478 | 0.496 | 0.025 |

Locus Ta2Caga3

|      |    |    |       |       |       |
|------|----|----|-------|-------|-------|
| allm | 10 | 11 | 0.700 | 0.842 | 0.077 |
| alls | 15 | 17 | 0.800 | 0.949 | 0.076 |
| amb1 | 20 | 13 | 0.684 | 0.724 | 0.023 |
| amb3 | 28 | 17 | 0.778 | 0.739 | 0.000 |
| amb4 | 19 | 11 | 0.632 | 0.775 | 0.081 |
| birk | 9  | 10 | 0.889 | 0.902 | 0.007 |
| chap | 23 | 13 | 0.696 | 0.833 | 0.075 |
| ente | 20 | 18 | 0.632 | 0.747 | 0.066 |
| esch | 19 | 17 | 0.789 | 0.906 | 0.061 |
| flgu | 19 | 20 | 0.789 | 0.858 | 0.037 |
| fucu | 20 | 17 | 0.800 | 0.877 | 0.041 |
| grab | 42 | 27 | 0.854 | 0.933 | 0.041 |
| grut | 6  | 6  | 0.667 | 0.758 | 0.052 |
| gurw | 18 | 12 | 0.611 | 0.746 | 0.077 |
| haup | 21 | 17 | 0.800 | 0.892 | 0.049 |
| hell | 20 | 15 | 0.850 | 0.885 | 0.019 |
| hiwi | 14 | 9  | 0.643 | 0.632 | 0.000 |
| home | 23 | 18 | 0.739 | 0.850 | 0.060 |
| hubw | 20 | 13 | 0.800 | 0.882 | 0.044 |
| hund | 22 | 13 | 0.864 | 0.850 | 0.000 |
| insl | 21 | 15 | 0.905 | 0.801 | 0.000 |
| isol | 20 | 13 | 0.700 | 0.863 | 0.087 |
| jmai | 17 | 11 | 0.824 | 0.775 | 0.000 |

|                |      |    |       |       |       |
|----------------|------|----|-------|-------|-------|
| jnw1           | 20   | 18 | 0.800 | 0.903 | 0.054 |
| kzwi           | 18   | 14 | 0.889 | 0.902 | 0.007 |
| lang           | 20   | 15 | 0.700 | 0.865 | 0.088 |
| mosl           | 27   | 18 | 0.852 | 0.809 | 0.000 |
| mrbm           | 20   | 13 | 0.750 | 0.758 | 0.005 |
| mrbn           | 21   | 14 | 0.714 | 0.784 | 0.039 |
| mrbs           | 22   | 16 | 0.682 | 0.678 | 0.000 |
| muet           | 20   | 16 | 0.650 | 0.881 | 0.123 |
| oloo           | 20   | 18 | 0.850 | 0.844 | 0.000 |
| opfi           | 21   | 14 | 0.667 | 0.844 | 0.096 |
| piro           | 20   | 12 | 0.600 | 0.831 | 0.126 |
| raue           | 7    | 9  | 0.571 | 0.868 | 0.159 |
| rauw           | 53   | 27 | 0.736 | 0.862 | 0.068 |
| schl           | 19   | 15 | 0.842 | 0.832 | 0.000 |
| wolf           | 7    | 11 | 0.857 | 0.956 | 0.051 |
| wtal           | 18   | 14 | 0.778 | 0.911 | 0.070 |
| zurl           | 16   | 13 | 0.563 | 0.821 | 0.142 |
| zurs           | 21   | 16 | 0.810 | 0.868 | 0.031 |
| <u>average</u> | 19.9 |    | 0.750 | 0.835 | 0.050 |

Locus Ta3Caga2

|      |    |   |       |       |       |
|------|----|---|-------|-------|-------|
| allm | 10 | 2 | 0.500 | 0.521 | 0.014 |
| alls | 15 | 2 | 0.533 | 0.497 | 0.000 |
| amb1 | 20 | 5 | 0.450 | 0.671 | 0.132 |
| amb3 | 28 | 4 | 0.481 | 0.544 | 0.041 |
| amb4 | 19 | 3 | 0.684 | 0.531 | 0.000 |
| birk | 9  | 3 | 0.667 | 0.582 | 0.000 |
| chap | 23 | 4 | 0.261 | 0.305 | 0.034 |
| ente | 20 | 2 | 0.778 | 0.508 | 0.000 |
| esch | 19 | 2 | 0.579 | 0.508 | 0.000 |
| figu | 19 | 2 | 0.526 | 0.444 | 0.000 |
| fucu | 20 | 3 | 0.550 | 0.499 | 0.000 |
| grab | 42 | 2 | 0.463 | 0.409 | 0.000 |
| grut | 6  | 2 | 0.667 | 0.485 | 0.000 |
| gurw | 18 | 3 | 0.200 | 0.434 | 0.163 |
| haup | 21 | 3 | 0.450 | 0.481 | 0.021 |
| hell | 20 | 2 | 0.500 | 0.508 | 0.005 |
| hiwi | 14 | 6 | 0.357 | 0.775 | 0.235 |
| home | 23 | 4 | 0.522 | 0.538 | 0.010 |
| hubw | 20 | 3 | 0.250 | 0.296 | 0.035 |
| hund | 22 | 3 | 0.455 | 0.507 | 0.035 |
| insl | 21 | 2 | 0.429 | 0.345 | 0.000 |
| isol | 20 | 2 | 0.500 | 0.492 | 0.000 |
| jmai | 17 | 4 | 0.625 | 0.591 | 0.000 |
| jnw1 | 20 | 3 | 0.350 | 0.409 | 0.042 |
| kzwi | 18 | 2 | 0.444 | 0.457 | 0.009 |
| lang | 20 | 3 | 0.412 | 0.508 | 0.064 |
| mosl | 27 | 3 | 0.333 | 0.498 | 0.110 |
| mrbm | 20 | 3 | 0.421 | 0.444 | 0.016 |
| mrbn | 21 | 4 | 0.429 | 0.501 | 0.048 |
| mrbs | 22 | 4 | 0.500 | 0.532 | 0.021 |
| muet | 20 | 3 | 0.300 | 0.492 | 0.129 |
| oloo | 20 | 2 | 0.500 | 0.467 | 0.000 |
| opfi | 21 | 2 | 0.476 | 0.372 | 0.000 |
| piro | 20 | 2 | 0.579 | 0.491 | 0.000 |
| raue | 7  | 2 | 0.714 | 0.495 | 0.000 |
| rauw | 53 | 2 | 0.538 | 0.493 | 0.000 |

|                |      |   |       |       |       |
|----------------|------|---|-------|-------|-------|
| schl           | 19   | 4 | 0.375 | 0.556 | 0.116 |
| wolf           | 7    | 2 | 0.571 | 0.527 | 0.000 |
| wtal           | 18   | 3 | 0.389 | 0.500 | 0.074 |
| zurl           | 16   | 2 | 0.533 | 0.460 | 0.000 |
| zurs           | 21   | 2 | 0.714 | 0.494 | 0.000 |
| <u>average</u> | 19.9 |   | 0.5   | 0.500 | 0.033 |

Locus Ta4Caga4

|                |      |   |       |       |       |
|----------------|------|---|-------|-------|-------|
| allm           | 10   | 3 | 0.700 | 0.695 | 0.000 |
| alls           | 15   | 7 | 0.467 | 0.662 | 0.117 |
| amb1           | 20   | 4 | 0.375 | 0.685 | 0.184 |
| amb3           | 28   | 5 | 0.542 | 0.636 | 0.057 |
| amb4           | 19   | 5 | 0.474 | 0.673 | 0.119 |
| birk           | 9    | 3 | 0.667 | 0.680 | 0.008 |
| chap           | 23   | 5 | 0.364 | 0.455 | 0.063 |
| ente           | 20   | 5 | 0.600 | 0.678 | 0.046 |
| esch           | 19   | 9 | 0.579 | 0.772 | 0.109 |
| figu           | 19   | 5 | 0.789 | 0.713 | 0.000 |
| fucu           | 20   | 6 | 0.250 | 0.644 | 0.240 |
| grab           | 42   | 7 | 0.700 | 0.706 | 0.004 |
| grut           | 6    | 6 | 0.500 | 0.833 | 0.182 |
| gurw           | 18   | 6 | 0.250 | 0.678 | 0.255 |
| haup           | 21   | 6 | 0.450 | 0.713 | 0.154 |
| hell           | 20   | 4 | 0.300 | 0.642 | 0.208 |
| hiwi           | 14   | 6 | 0.500 | 0.732 | 0.134 |
| home           | 23   | 7 | 0.522 | 0.746 | 0.128 |
| hubw           | 20   | 7 | 0.700 | 0.787 | 0.049 |
| hund           | 22   | 5 | 0.722 | 0.617 | 0.000 |
| insl           | 21   | 6 | 0.550 | 0.712 | 0.095 |
| isol           | 20   | 4 | 0.737 | 0.656 | 0.000 |
| jmai           | 17   | 8 | 0.600 | 0.768 | 0.095 |
| jnw1           | 20   | 6 | 0.529 | 0.679 | 0.089 |
| kzwi           | 18   | 6 | 0.444 | 0.732 | 0.166 |
| lang           | 20   | 6 | 0.588 | 0.734 | 0.084 |
| mosl           | 27   | 4 | 0.556 | 0.645 | 0.054 |
| mrbm           | 20   | 4 | 0.350 | 0.665 | 0.189 |
| mrbn           | 21   | 8 | 0.737 | 0.768 | 0.018 |
| mrbs           | 22   | 7 | 0.636 | 0.737 | 0.058 |
| muet           | 20   | 3 | 0.700 | 0.682 | 0.000 |
| oloo           | 20   | 6 | 0.474 | 0.708 | 0.137 |
| opfi           | 21   | 7 | 0.286 | 0.647 | 0.219 |
| piro           | 20   | 5 | 0.722 | 0.708 | 0.000 |
| raue           | 7    | 4 | 0.429 | 0.692 | 0.155 |
| rauw           | 53   | 9 | 0.735 | 0.727 | 0.000 |
| schl           | 19   | 5 | 0.313 | 0.563 | 0.160 |
| wolf           | 7    | 6 | 0.429 | 0.703 | 0.161 |
| wtal           | 18   | 6 | 0.500 | 0.694 | 0.115 |
| zurl           | 16   | 7 | 0.533 | 0.740 | 0.119 |
| zurs           | 21   | 6 | 0.400 | 0.672 | 0.163 |
| <u>average</u> | 19.9 |   | 0.53  | 0.690 | 0.101 |

Locus Ta3Caga1

|      |    |    |       |       |       |
|------|----|----|-------|-------|-------|
| allm | 10 | 14 | 1.000 | 0.947 | 0.000 |
| alls | 15 | 16 | 0.933 | 0.947 | 0.007 |
| amb1 | 20 | 22 | 0.550 | 0.964 | 0.211 |
| amb3 | 28 | 22 | 0.846 | 0.953 | 0.055 |
| amb4 | 19 | 16 | 0.706 | 0.913 | 0.108 |



|                |      |    |       |       |       |
|----------------|------|----|-------|-------|-------|
| birk           | 9    | 12 | 0.889 | 0.941 | 0.027 |
| chap           | 23   | 18 | 0.895 | 0.939 | 0.023 |
| ente           | 20   | 18 | 0.632 | 0.949 | 0.163 |
| esch           | 19   | 18 | 0.684 | 0.939 | 0.132 |
| flgu           | 19   | 18 | 1.000 | 0.952 | 0.000 |
| fucu           | 20   | 18 | 0.750 | 0.940 | 0.098 |
| grab           | 42   | 24 | 0.625 | 0.926 | 0.156 |
| grut           | 6    | 9  | 0.667 | 0.939 | 0.140 |
| gurw           | 18   | 14 | 0.611 | 0.932 | 0.166 |
| haup           | 21   | 22 | 0.800 | 0.960 | 0.082 |
| hell           | 20   | 22 | 0.850 | 0.959 | 0.056 |
| hiwi           | 14   | 14 | 0.667 | 0.935 | 0.139 |
| home           | 23   | 19 | 0.571 | 0.951 | 0.195 |
| hubw           | 20   | 16 | 0.800 | 0.913 | 0.059 |
| hund           | 22   | 19 | 0.818 | 0.948 | 0.067 |
| insl           | 21   | 26 | 0.810 | 0.957 | 0.075 |
| isol           | 20   | 18 | 0.947 | 0.932 | 0.000 |
| jmai           | 17   | 18 | 0.625 | 0.956 | 0.169 |
| jnw1           | 20   | 18 | 0.650 | 0.945 | 0.152 |
| kzwi           | 18   | 18 | 0.611 | 0.952 | 0.175 |
| lang           | 20   | 15 | 0.667 | 0.933 | 0.138 |
| mosl           | 27   | 26 | 0.815 | 0.963 | 0.075 |
| mrbm           | 20   | 14 | 0.850 | 0.914 | 0.033 |
| mrbn           | 21   | 18 | 0.810 | 0.945 | 0.069 |
| mrbs           | 22   | 18 | 0.952 | 0.940 | 0.000 |
| muet           | 20   | 19 | 0.900 | 0.955 | 0.028 |
| oloo           | 20   | 21 | 0.650 | 0.933 | 0.146 |
| opfi           | 21   | 25 | 0.850 | 0.969 | 0.060 |
| piro           | 20   | 17 | 0.750 | 0.937 | 0.097 |
| raue           | 7    | 8  | 0.333 | 0.879 | 0.291 |
| rauw           | 53   | 29 | 0.941 | 0.955 | 0.007 |
| schl           | 19   | 21 | 0.684 | 0.959 | 0.140 |
| wolf           | 7    | 8  | 0.714 | 0.901 | 0.098 |
| wtal           | 18   | 19 | 0.722 | 0.929 | 0.107 |
| zurl           | 16   | 18 | 0.800 | 0.954 | 0.079 |
| zurs           | 21   | 21 | 0.714 | 0.913 | 0.104 |
| <u>average</u> | 19.9 |    | 0.760 | 0.940 | 0.096 |

Locus Ta6Ca1

|      |    |   |       |       |       |
|------|----|---|-------|-------|-------|
| allm | 10 | 4 | 0.300 | 0.611 | 0.193 |
| alls | 15 | 5 | 0.333 | 0.405 | 0.051 |
| amb1 | 20 | 4 | 0.263 | 0.383 | 0.087 |
| amb3 | 28 | 4 | 0.217 | 0.527 | 0.203 |
| amb4 | 19 | 6 | 0.235 | 0.643 | 0.248 |
| birk | 9  | 4 | 0.222 | 0.464 | 0.165 |
| chap | 23 | 4 | 0.308 | 0.514 | 0.136 |
| ente | 20 | 5 | 0.176 | 0.629 | 0.278 |
| esch | 19 | 5 | 0.167 | 0.563 | 0.253 |
| flgu | 19 | 4 | 0.133 | 0.577 | 0.282 |
| fucu | 20 | 5 | 0.111 | 0.656 | 0.329 |
| grab | 42 | 6 | 0.293 | 0.427 | 0.094 |
| grut | 6  | 3 | 0.200 | 0.556 | 0.229 |
| gurw | 18 | 5 | 0.077 | 0.452 | 0.258 |
| haup | 21 | 4 | 0.188 | 0.280 | 0.072 |
| hell | 20 | 4 | 0.167 | 0.475 | 0.209 |
| hiwi | 14 | 3 | 0.182 | 0.416 | 0.165 |
| home | 23 | 4 | 0.333 | 0.489 | 0.105 |

|                |      |   |       |       |       |
|----------------|------|---|-------|-------|-------|
| hubw           | 20   | 4 | 0.235 | 0.608 | 0.232 |
| hund           | 22   | 4 | 0.300 | 0.528 | 0.149 |
| insl           | 21   | 4 | 0.286 | 0.400 | 0.081 |
| isol           | 20   | 4 | 0.333 | 0.665 | 0.199 |
| jmai           | 17   | 5 | 0.313 | 0.675 | 0.216 |
| jnw1           | 20   | 5 | 0.188 | 0.470 | 0.192 |
| kzwi           | 18   | 5 | 0.188 | 0.563 | 0.240 |
| lang           | 20   | 5 | 0.059 | 0.519 | 0.303 |
| mosl           | 27   | 5 | 0.391 | 0.612 | 0.137 |
| mrbm           | 20   | 5 | 0.350 | 0.663 | 0.188 |
| mrbn           | 21   | 5 | 0.429 | 0.647 | 0.132 |
| mrbs           | 22   | 4 | 0.333 | 0.511 | 0.118 |
| muet           | 20   | 4 | 0.158 | 0.494 | 0.225 |
| oloo           | 20   | 5 | 0.471 | 0.640 | 0.103 |
| opfi           | 21   | 4 | 0.067 | 0.545 | 0.309 |
| piro           | 20   | 5 | 0.263 | 0.615 | 0.218 |
| raue           | 7    | 4 | 0.400 | 0.600 | 0.125 |
| rauw           | 53   | 5 | 0.458 | 0.666 | 0.125 |
| schl           | 19   | 3 | 0.389 | 0.475 | 0.058 |
| wolf           | 7    | 3 | 0.429 | 0.560 | 0.084 |
| wtal           | 18   | 4 | 0.111 | 0.508 | 0.263 |
| zurl           | 16   | 4 | 0.154 | 0.557 | 0.259 |
| zurs           | 21   | 5 | 0.278 | 0.592 | 0.197 |
| <u>average</u> | 19.9 |   | 0.260 | 0.540 | 0.183 |

Locus Ta3Ca8

|      |    |   |       |       |       |
|------|----|---|-------|-------|-------|
| allm | 10 | 4 | 0.700 | 0.721 | 0.012 |
| alls | 15 | 8 | 0.571 | 0.722 | 0.088 |
| amb1 | 20 | 4 | 0.385 | 0.689 | 0.180 |
| amb3 | 28 | 7 | 0.680 | 0.733 | 0.031 |
| amb4 | 19 | 4 | 0.444 | 0.652 | 0.126 |
| birk | 9  | 5 | 0.500 | 0.725 | 0.130 |
| chap | 23 | 7 | 0.667 | 0.745 | 0.045 |
| ente | 20 | 6 | 0.579 | 0.696 | 0.069 |
| esch | 19 | 7 | 0.737 | 0.734 | 0.000 |
| figu | 19 | 4 | 0.722 | 0.687 | 0.000 |
| fucu | 20 | 6 | 0.316 | 0.627 | 0.191 |
| grab | 42 | 7 | 0.600 | 0.716 | 0.068 |
| grut | 6  | 5 | 0.500 | 0.652 | 0.092 |
| gurw | 18 | 5 | 0.231 | 0.625 | 0.242 |
| haup | 21 | 7 | 0.611 | 0.744 | 0.076 |
| hell | 20 | 5 | 0.632 | 0.673 | 0.025 |
| hiwi | 14 | 5 | 0.556 | 0.712 | 0.091 |
| home | 23 | 6 | 0.750 | 0.736 | 0.000 |
| hubw | 20 | 5 | 0.700 | 0.714 | 0.008 |
| hund | 22 | 8 | 0.524 | 0.675 | 0.090 |
| insl | 21 | 4 | 0.571 | 0.587 | 0.010 |
| isol | 20 | 4 | 0.700 | 0.676 | 0.000 |
| jmai | 17 | 9 | 0.667 | 0.798 | 0.073 |
| jnw1 | 20 | 4 | 0.737 | 0.707 | 0.000 |
| kzwi | 18 | 7 | 0.563 | 0.786 | 0.125 |
| lang | 20 | 6 | 0.667 | 0.729 | 0.036 |
| mosl | 27 | 3 | 0.692 | 0.667 | 0.000 |
| mrbm | 20 | 4 | 0.579 | 0.661 | 0.049 |
| mrbn | 21 | 4 | 0.875 | 0.688 | 0.000 |
| mrbs | 22 | 7 | 0.667 | 0.728 | 0.035 |
| muet | 20 | 4 | 0.800 | 0.695 | 0.000 |

|                |      |   |       |       |       |
|----------------|------|---|-------|-------|-------|
| oloo           | 20   | 3 | 0.667 | 0.675 | 0.005 |
| opfi           | 21   | 6 | 0.529 | 0.663 | 0.081 |
| piro           | 20   | 6 | 0.857 | 0.754 | 0.000 |
| raue           | 7    | 4 | 0.400 | 0.733 | 0.192 |
| rauw           | 53   | 6 | 0.739 | 0.718 | 0.000 |
| schl           | 19   | 5 | 0.462 | 0.455 | 0.000 |
| wolf           | 7    | 7 | 0.429 | 0.791 | 0.202 |
| wtal           | 18   | 6 | 0.611 | 0.711 | 0.058 |
| zurl           | 16   | 5 | 0.500 | 0.688 | 0.111 |
| zurs           | 21   | 6 | 0.550 | 0.645 | 0.058 |
| <u>average</u> | 19.9 |   | 0.600 | 0.700 | 0.063 |

---

## Part 2

| Population | Population averages |      |      |
|------------|---------------------|------|------|
|            | A                   | Ho   | He   |
| allm       | 6.0                 | 0.64 | 0.70 |
| alls       | 8.6                 | 0.62 | 0.70 |
| amb1       | 8.4                 | 0.46 | 0.68 |
| amb3       | 9.3                 | 0.56 | 0.68 |
| amb4       | 7.1                 | 0.52 | 0.68 |
| birk       | 5.7                 | 0.63 | 0.69 |
| chap       | 7.7                 | 0.49 | 0.60 |
| ente       | 8.3                 | 0.53 | 0.66 |
| esch       | 8.6                 | 0.55 | 0.67 |
| flgu       | 8.1                 | 0.64 | 0.68 |
| fucu       | 8.4                 | 0.44 | 0.66 |
| grab       | 11.0                | 0.6  | 0.67 |
| grut       | 4.7                 | 0.53 | 0.68 |
| gurw       | 6.9                 | 0.34 | 0.61 |
| haup       | 9.1                 | 0.54 | 0.67 |
| hell       | 8.3                 | 0.55 | 0.67 |
| hiwi       | 6.9                 | 0.52 | 0.69 |
| home       | 9.1                 | 0.58 | 0.70 |
| hubw       | 7.3                 | 0.58 | 0.68 |
| hund       | 8.1                 | 0.6  | 0.67 |
| insl       | 8.9                 | 0.59 | 0.62 |
| isol       | 7.3                 | 0.63 | 0.68 |
| jmai       | 8.6                 | 0.58 | 0.72 |
| jnw1       | 8.0                 | 0.54 | 0.65 |
| kzwi       | 8.1                 | 0.52 | 0.71 |
| lang       | 8.1                 | 0.51 | 0.69 |
| mosl       | 8.9                 | 0.59 | 0.66 |
| mrbm       | 6.4                 | 0.53 | 0.64 |
| mrbn       | 8.3                 | 0.65 | 0.70 |
| mrbs       | 8.7                 | 0.61 | 0.66 |
| muet       | 7.6                 | 0.59 | 0.69 |
| oloo       | 8.6                 | 0.57 | 0.68 |
| opfi       | 9.0                 | 0.48 | 0.65 |
| piro       | 7.0                 | 0.59 | 0.67 |
| raue       | 4.7                 | 0.43 | 0.63 |

|      |      |      |      |
|------|------|------|------|
| rauw | 11.9 | 0.64 | 0.68 |
| schl | 8.0  | 0.51 | 0.62 |
| wolf | 5.6  | 0.55 | 0.69 |
| wtal | 8.0  | 0.53 | 0.68 |
| zurl | 7.6  | 0.53 | 0.67 |
| zurs | 8.6  | 0.54 | 0.66 |

---

### **Part 3**

| Locus          | A    | $F_{ST}$ | $F_{IS}$ |
|----------------|------|----------|----------|
| Ta1Ca1         | 13   | 0.022    | 0.012    |
| Ta2Caga3       | 51   | 0.014    | 0.048    |
| Ta3Caga2       | 9    | 0.034    | -0.020   |
| Ta4Caga4       | 20   | 0.010    | 0.148    |
| Ta3Caga1       | 48   | 0.012    | 0.139    |
| Ta6Ca1         | 9    | 0.015    | 0.436    |
| Ta3Ca8         | 18   | 0.011    | 0.126    |
| <u>Average</u> | 24.0 | 0.0156   | 0.1299   |

---

**Figure S1.** Results of Beaumont & Nichols's (1996, *Proc. R. Soc. Lond. B* 263:1619-1626) test for selection for the eight *Rana temporaria* and seven *Triturus alpestris* microsatellite loci, under the stepwise mutation model. Predicted  $F_{ST}$  (solid line) and its 99% CI (dotted lines) were simulated using observed values for loci, population, individuals, and median  $F_{ST}$ . For *R. temporaria*, marker RtCa9 showed evidence of divergent selection and was therefore discarded from analyses. None of the *T. alpestris* markers showed any evidence of selection.

Linkage disequilibrium, not shown here, was rarely significant (Markov chain method described in Raymond & Rousset [1995, *Evolution* 49:1280-1283]; implemented in GENEPOP 4.0.10). There were 21 two-way tests for LD among loci within each population. For *R. temporaria*, none of these tests was significant at  $\alpha = 0.05$  in 34 of the 48 populations, and all but one of the populations had significant results for  $\leq 2$  pairs of loci. For *T. alpestris*, an average of 1.0 of these tests was significant in each of the 41 populations, and all but three of the populations had significant results for  $\leq 2$  pairs of loci. This suggests that the markers were not closely linked.

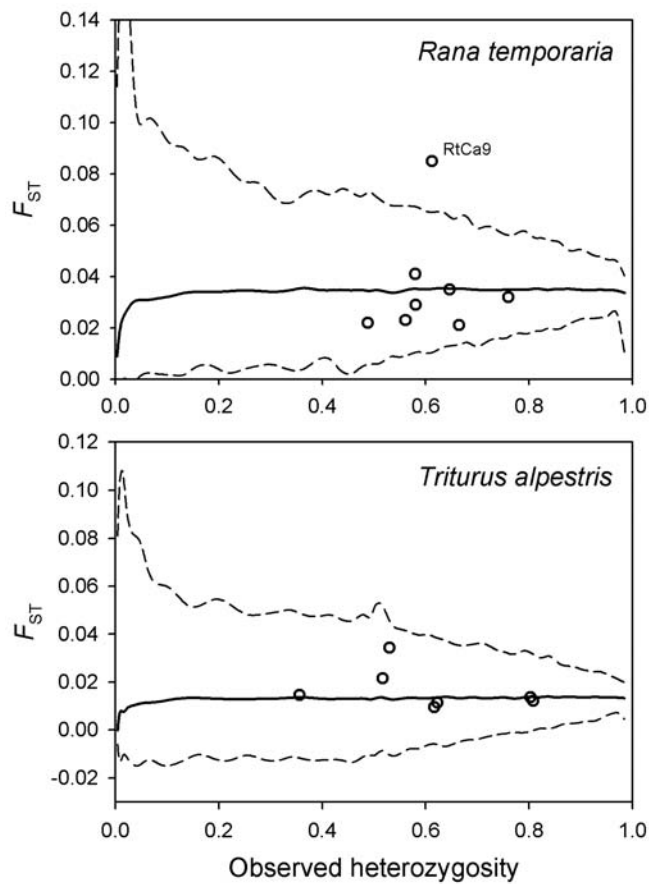

**Figure S2.** Isolation by distance among 48 populations of *Rana temporaria* (A) and 41 populations of *Triturus alpestris* (B) in northern Switzerland. Samples of both species were screened at the seven microsatellite loci described in Tables S2 and S3. The red line is a regression through the 1128 (*R. temporaria*) or 820 (*T. alpestris*) population pairs, which are indicated by the small black points. Blue points are averages ( $\pm$  95% CI) of categories spaced approximately evenly on the logarithmic scale. In both species, isolation by distance was significant in Mantel tests comparing genetic divergence with the log of geographic distance (*R. temporaria*:  $r = 0.236$ ,  $P = 0.0002$ ; *T. alpestris*:  $r = 0.143$ ,  $P = 0.0021$ ; vegan package in R).

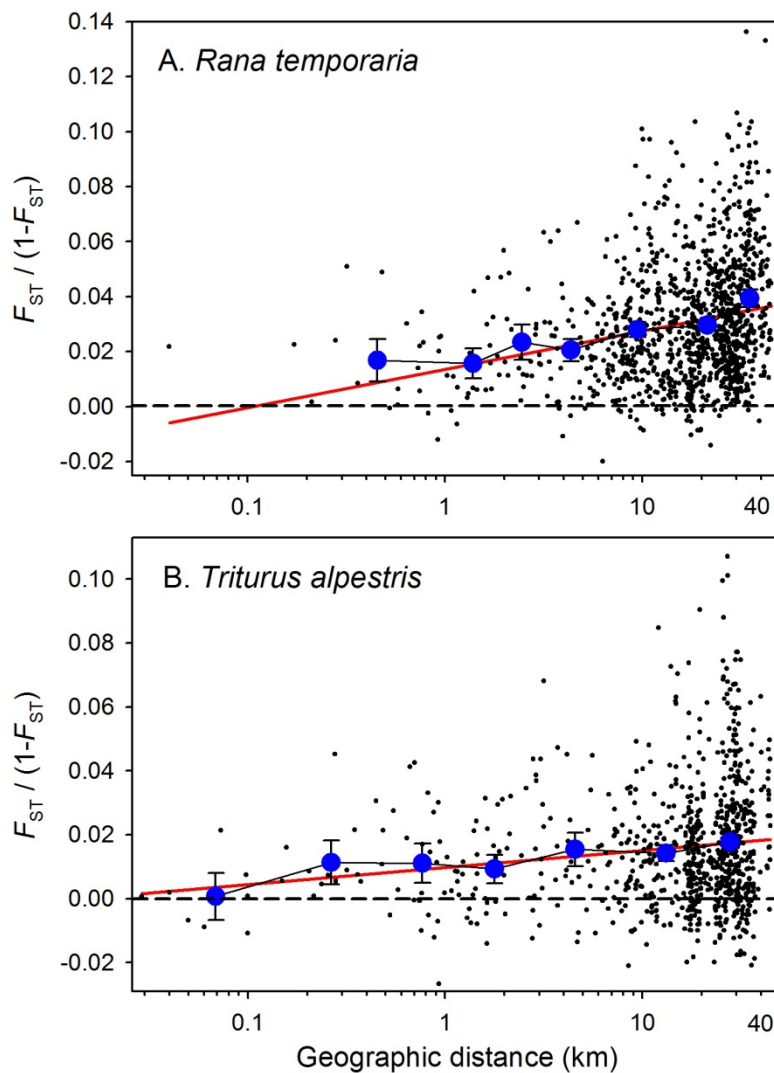

Supplement: ece30002-3160-SD1.pdf [file ece30002-3160-SD1.pdf]
